# Supplementary material for: A database of aircraft measurements of carbon monoxide (CO) with high temporal and spatial resolution during 2011–2021
Source: Copernicus journal article supplement (doi:10.5194/essd-15-4553-2023), 2023-10-12
Supplement: Supplementary file 1 [file essd-15-4553-2023-supplement.pdf]

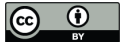

*Supplement of*

## **A database of aircraft measurements of carbon monoxide (CO) with high temporal and spatial resolution during 2011–2021**

**Chaoyang Xue et al.**

*Correspondence to:* Valéry Catoire ([valery.catoire@cnrs-orleans.fr](mailto:valery.catoire@cnrs-orleans.fr))

The copyright of individual parts of the supplement might differ from the article licence.

# 1. Flights during the SHIVA campaign

The five transfer flights are only shown in Figure 20 in the main text.

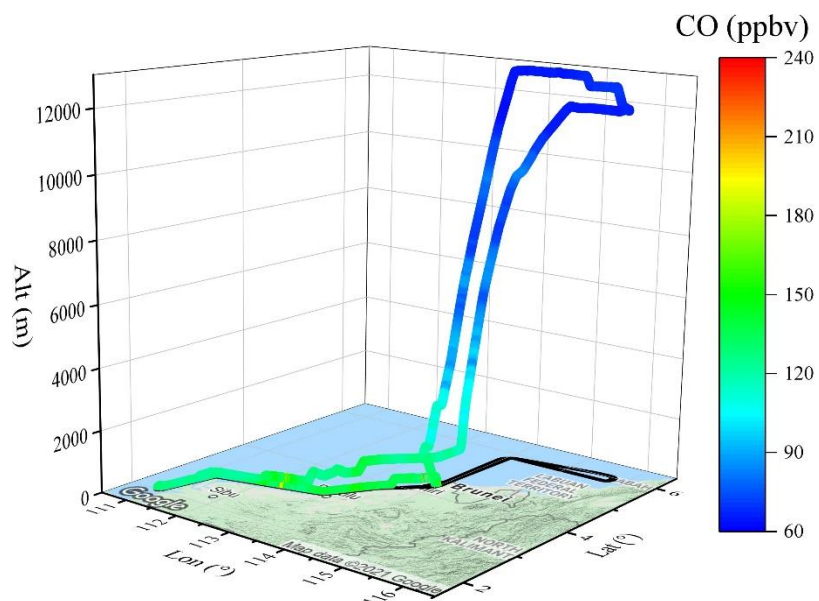

Figure S1: Flight trajectory colored by CO levels on flight-SHIVA\_20111116\_1. Map copyright: © GoogleMap.

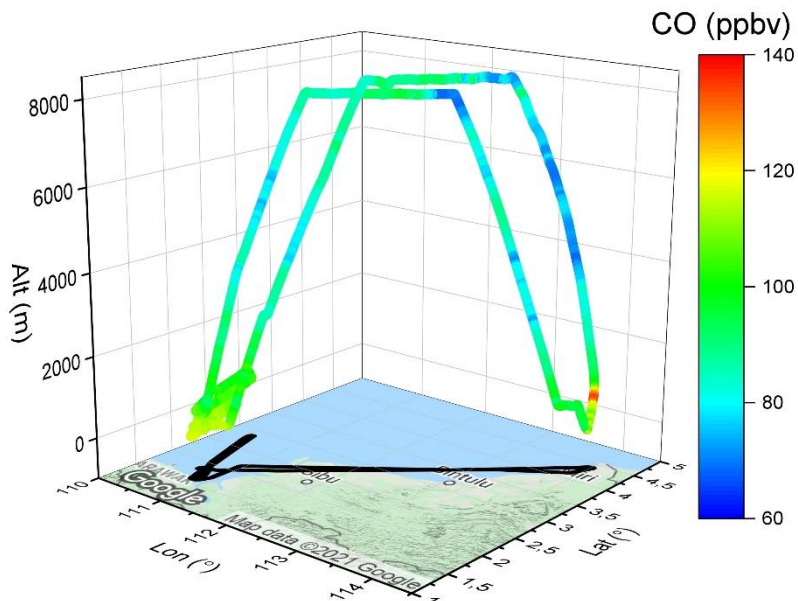

Figure S2: Flight trajectory colored by CO levels on flight-SHIVA\_20111119\_1. Map copyright: © GoogleMap.

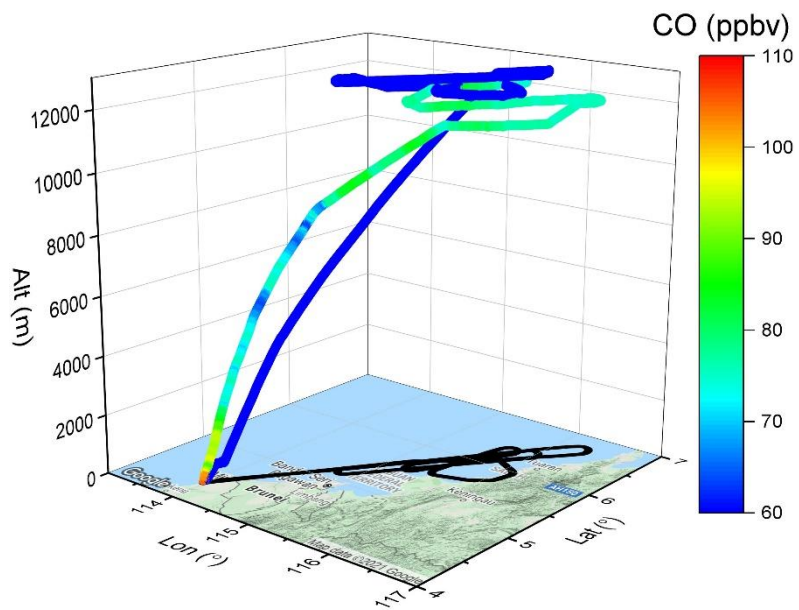

Figure S3: Flight trajectory colored by CO levels on flight-SHIVA\_20111119\_2. Map copyright: © GoogleMap.

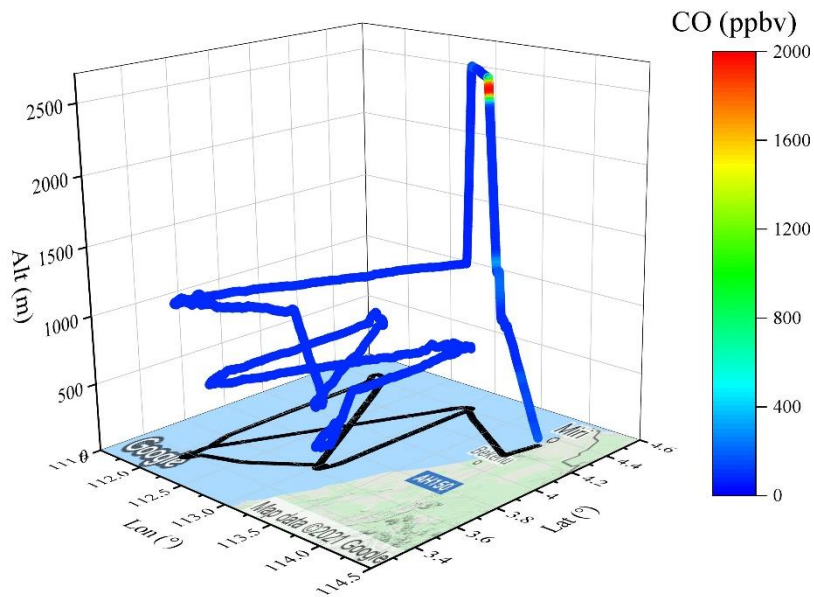

Figure S4: Flight trajectory colored by CO levels on flight-SHIVA\_20111121\_1. Map copyright: © GoogleMap.

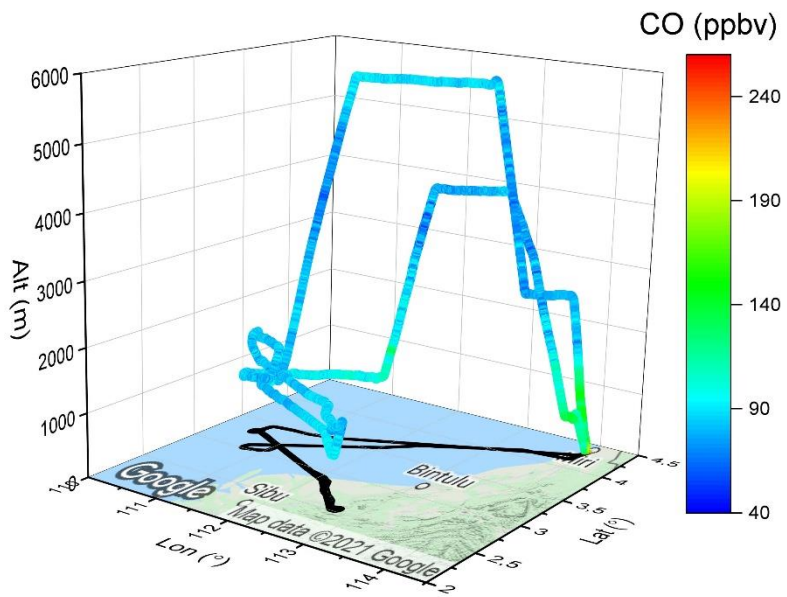

Figure S5: Flight trajectory colored by CO levels on flight-SHIVA\_2011122\_1. Map copyright: © GoogleMap.

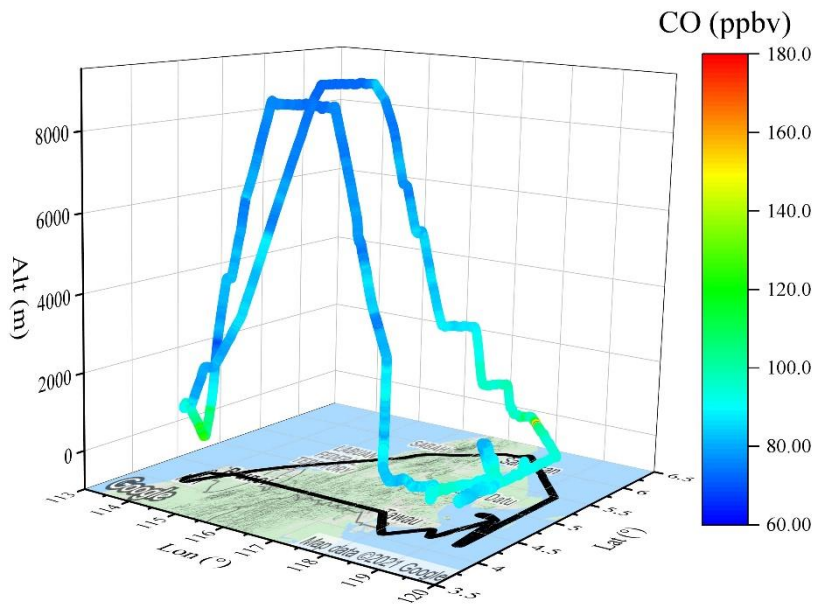

Figure S6: Flight trajectory colored by CO levels on flight-SHIVA\_2011123\_1. Map copyright: © GoogleMap.

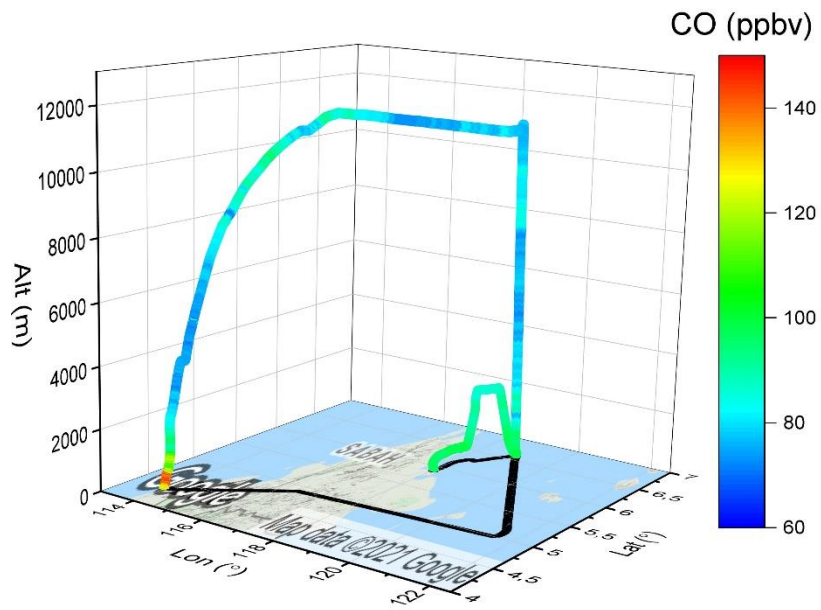

Figure S7: Flight trajectory colored by CO levels on flight-SHIVA\_2011126\_1. Map copyright: © GoogleMap.

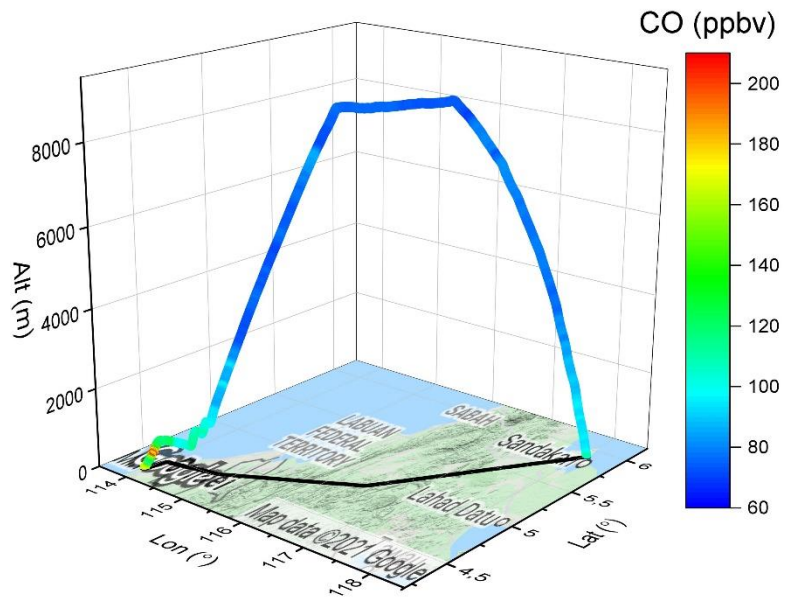

Figure S8: Flight trajectory colored by CO levels on flight-SHIVA\_2011126\_2. Map copyright: © GoogleMap.

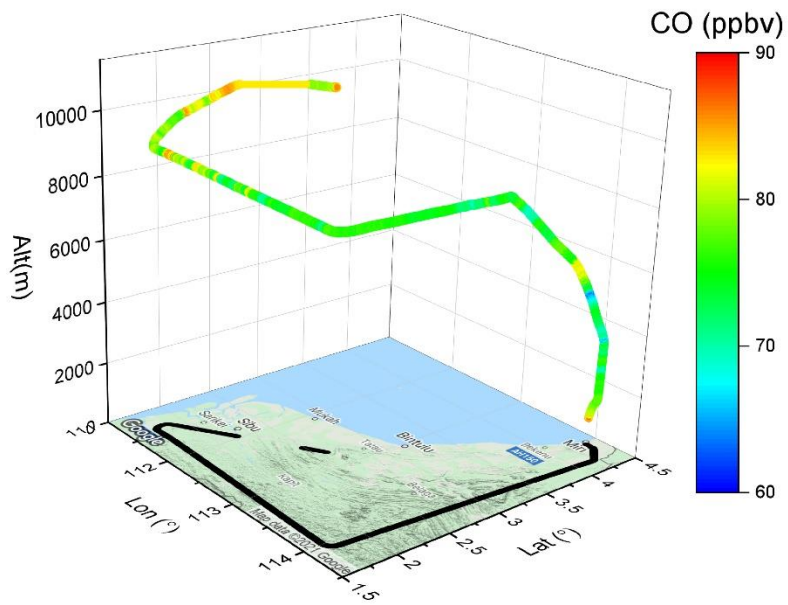

Figure S9: Flight trajectory colored by CO levels on flight-SHIVA\_20111202\_1. Map copyright: © GoogleMap.

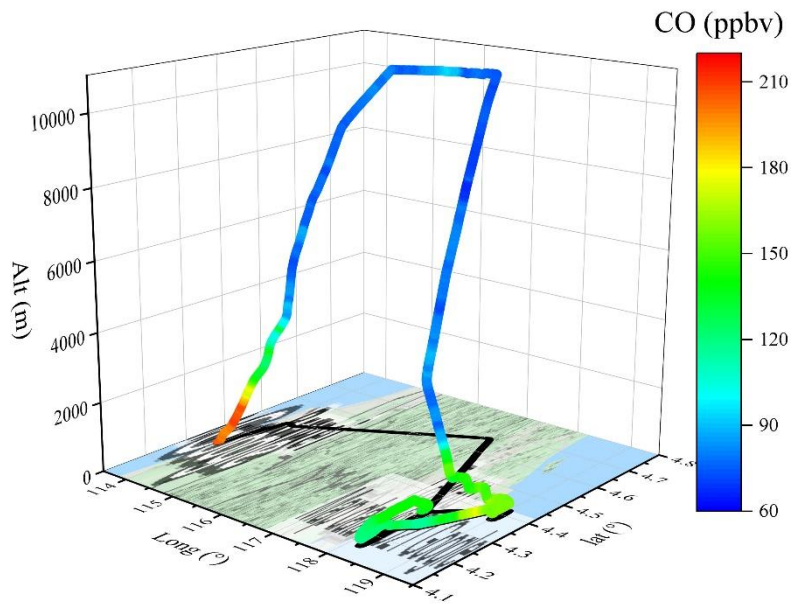

Figure S10: Flight trajectory colored by CO levels on flight-SHIVA\_20111207\_1. Map copyright: © GoogleMap.



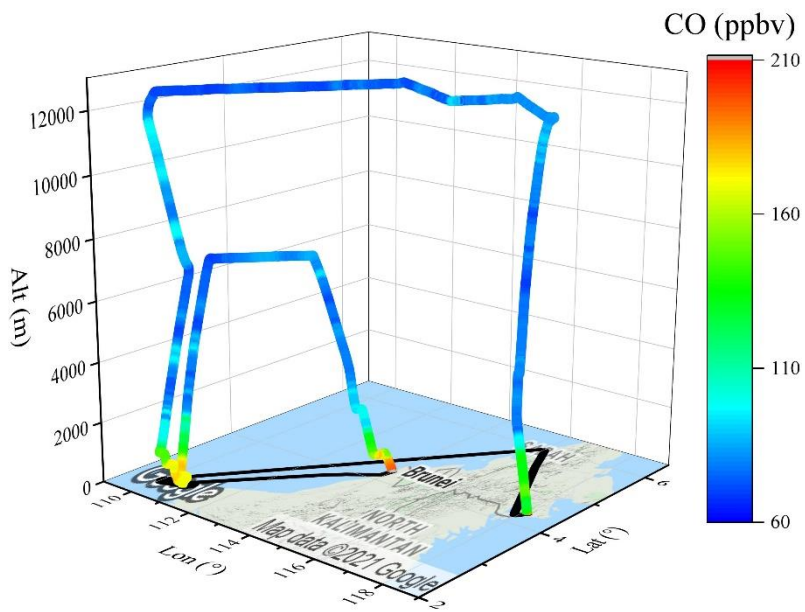

Figure S11: Flight trajectory colored by CO levels on flight-SHIVA\_20111207\_2. Map copyright: © GoogleMap.

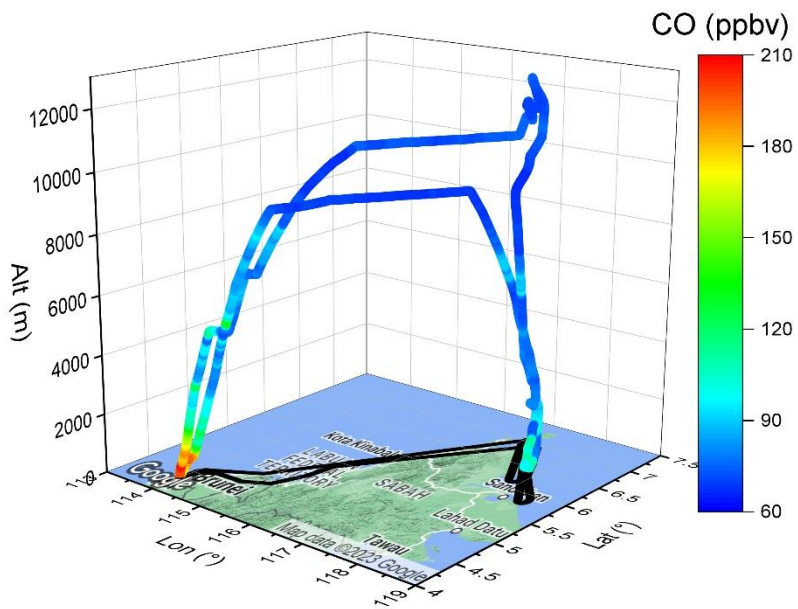

Figure S12: Flight trajectory colored by CO levels on flight-SHIVA\_20111208\_1. Map copyright: © GoogleMap.

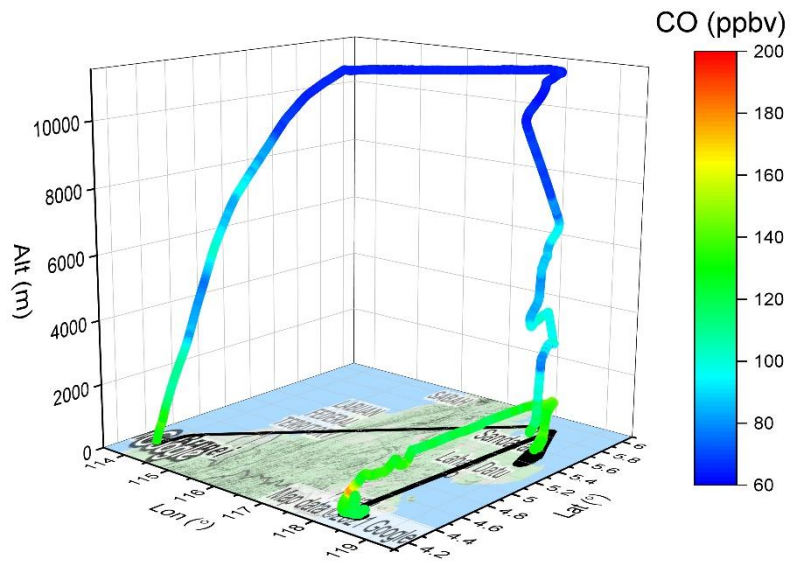

Figure S13: Flight trajectory colored by CO levels on flight-SHIVA\_20111209\_1. Map copyright: © GoogleMap.

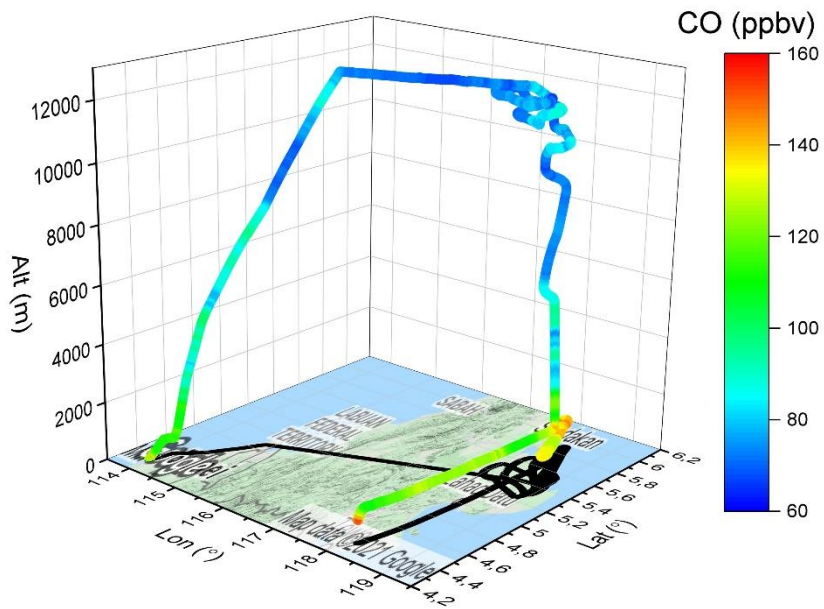

Figure S14: Flight trajectory colored by CO levels on flight-SHIVA\_20111209\_2. Map copyright: © GoogleMap.



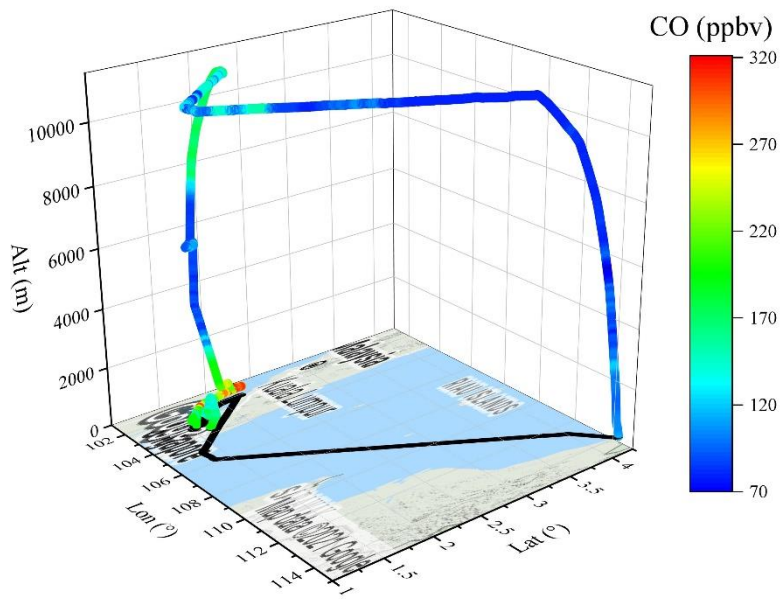

Figure S15: Flight trajectory colored by CO levels on flight-SHIVA\_20111211\_1. Map copyright: © GoogleMap.

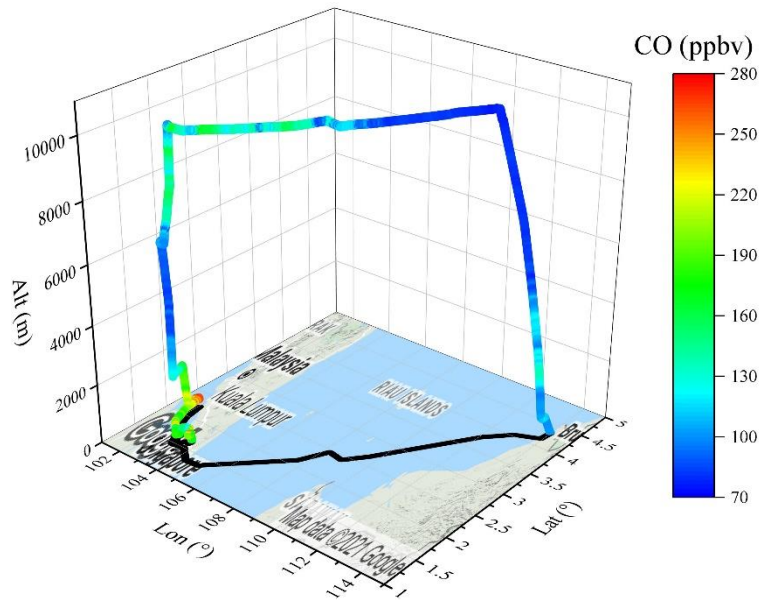

Figure S16: Flight trajectory colored by CO levels on flight-SHIVA\_20111211\_2. Map copyright: © GoogleMap.

## 2. Flights during the TC2 campaign

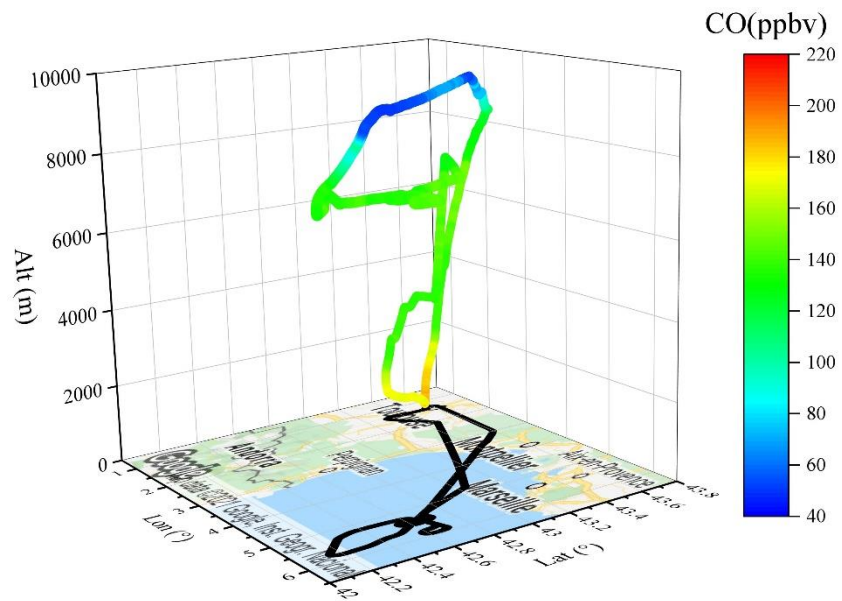

Figure S17: Flight trajectory colored by CO levels on flight-TC2\_20130312\_1. Map copyright: © GoogleMap.

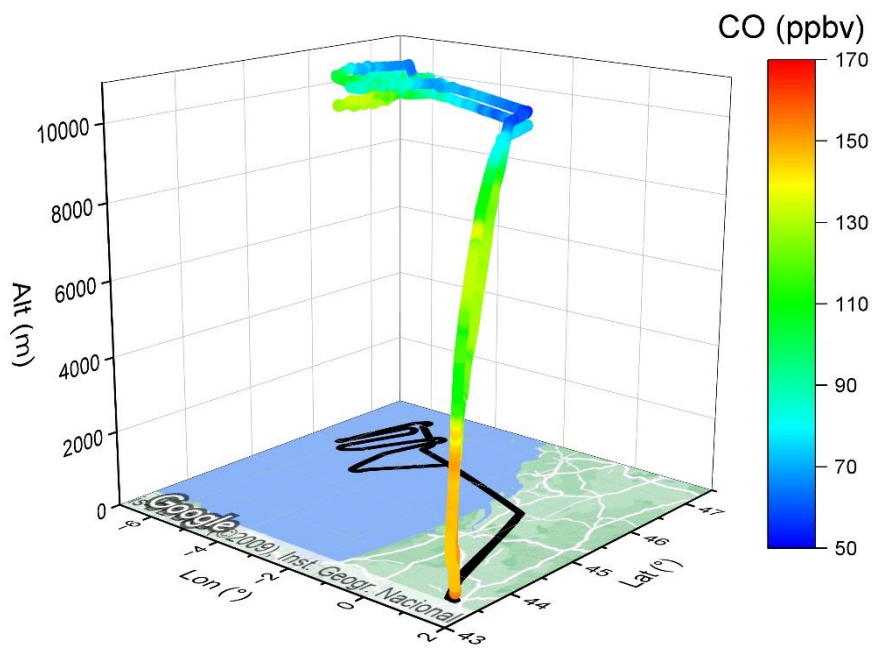

Figure S18: Flight trajectory colored by CO levels on flight-TC2\_20130320\_1. Map copyright: © GoogleMap.

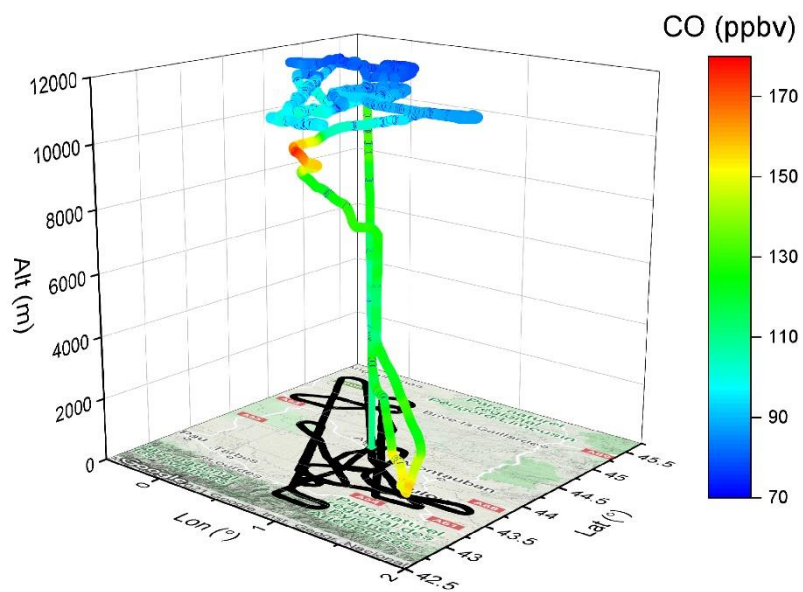

Figure S19: Flight trajectory colored by CO levels on flight-TC2\_20130321\_1. Map copyright: © GoogleMap.

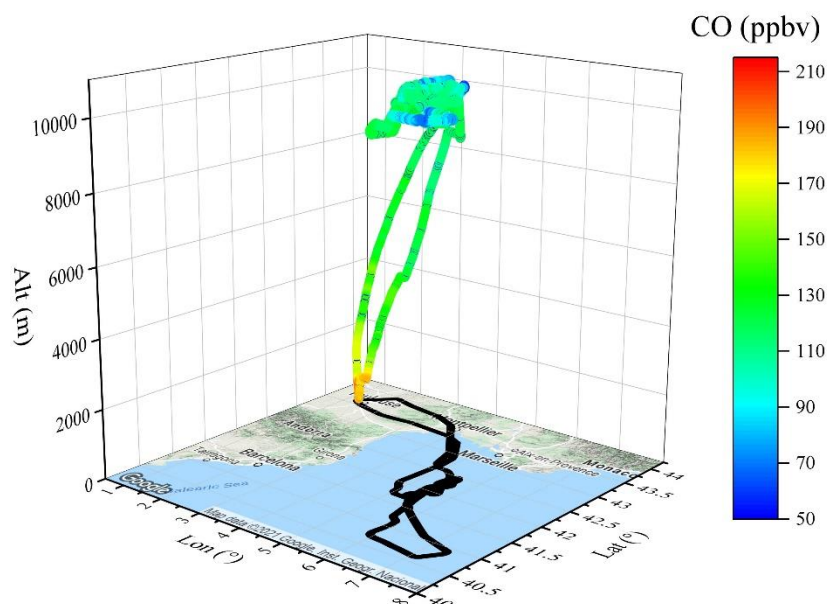

Figure S20: Flight trajectory colored by CO levels on flight-TC2\_20130326\_1. Map copyright: © GoogleMap.

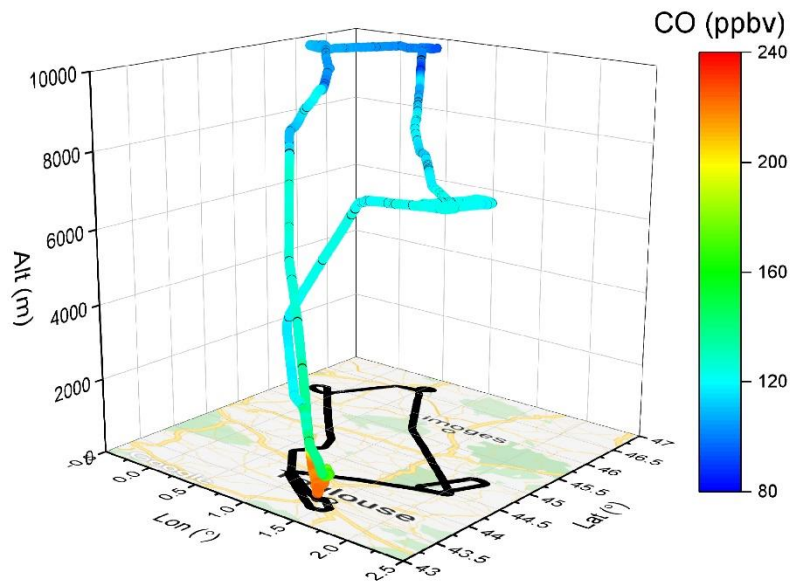

Figure S21: Flight trajectory colored by CO levels on flight-TC2\_20130328\_1. Map copyright: © GoogleMap.

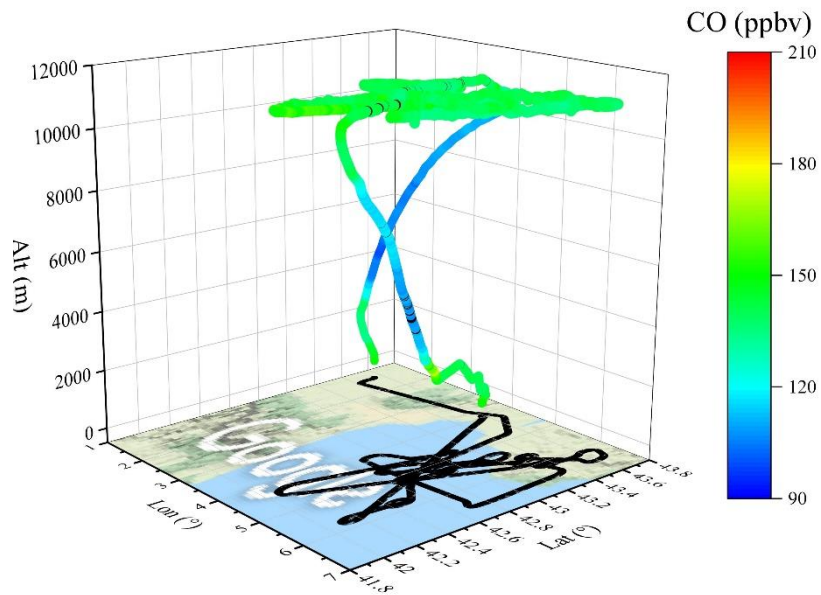

Figure S22: Flight trajectory colored by CO levels on flight-TC2\_20130410\_1. Map copyright: © GoogleMap.

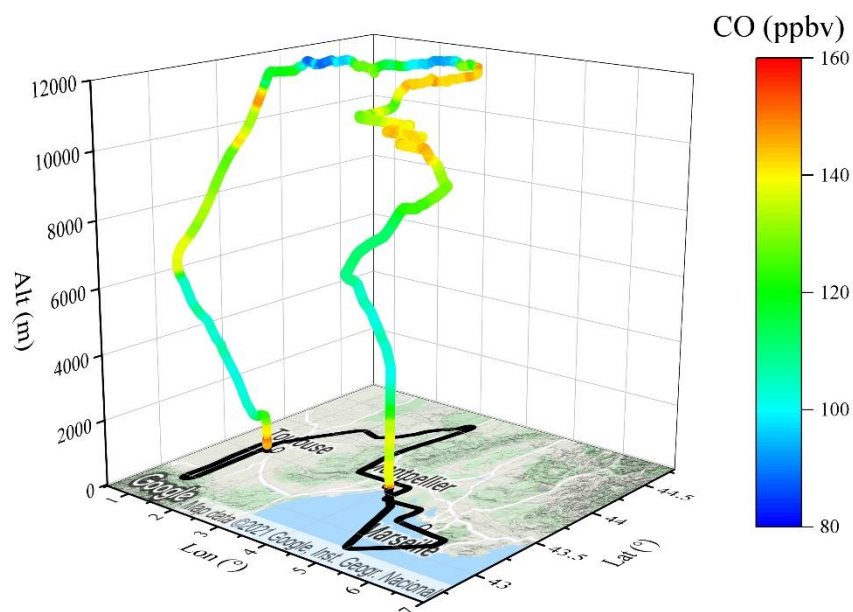

Figure S23: Flight trajectory colored by CO levels on flight-TC2\_20130410\_2. Map copyright: © GoogleMap.

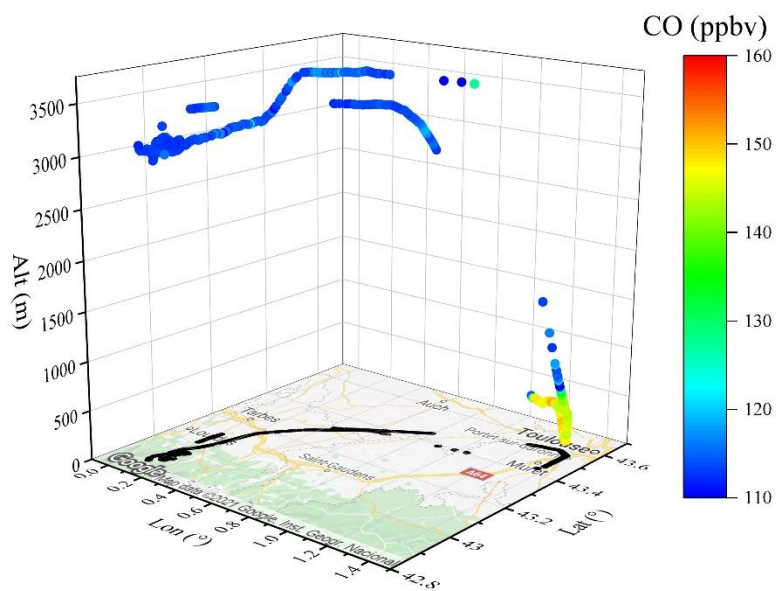

Figure S24: Flight trajectory colored by CO levels on flight-TC2\_20130411\_1. Map copyright: © GoogleMap.



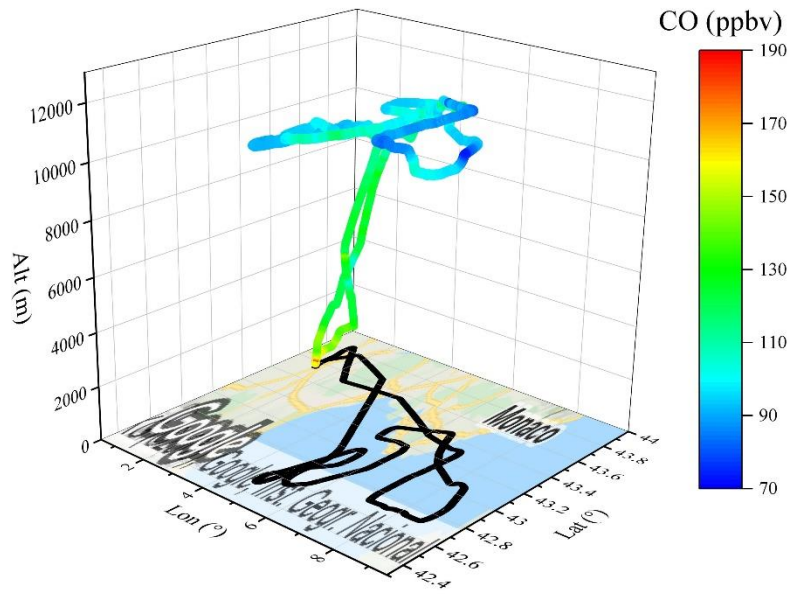

Figure S25: Flight trajectory colored by CO levels on flight-TC2\_20130416\_1. Map copyright: © GoogleMap.

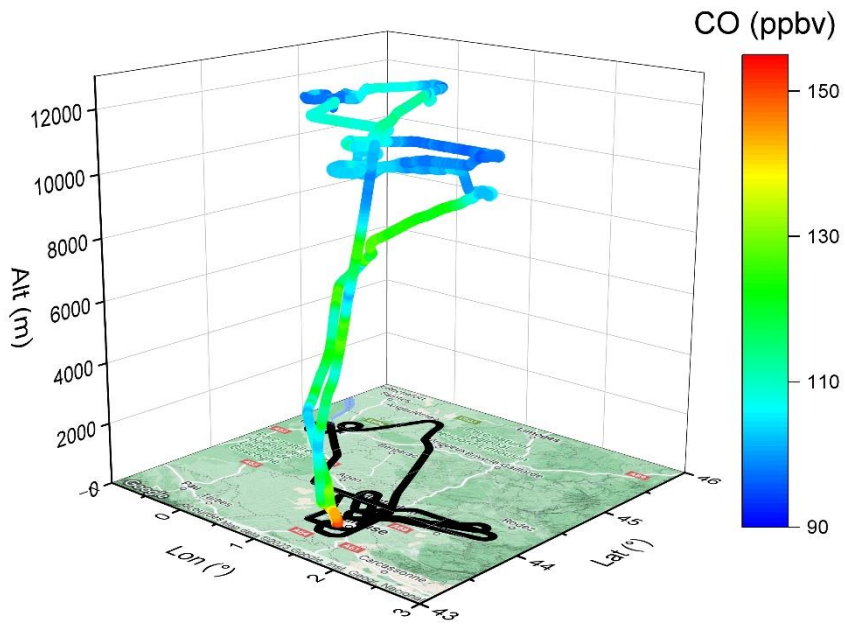

Figure S26: Flight trajectory colored by CO levels on flight-TC2\_20130417\_1. Map copyright: © GoogleMap.



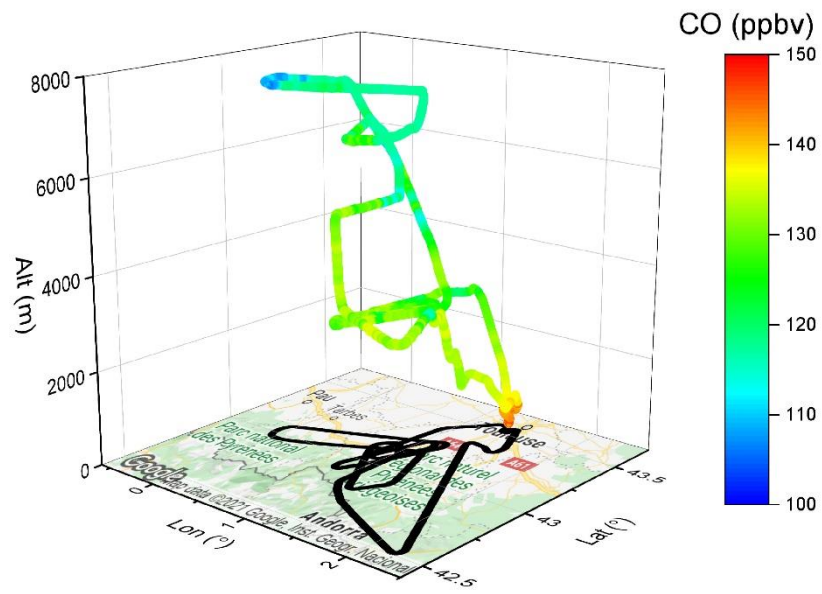

Figure S27: Flight trajectory colored by CO levels on flight-TC2\_20130531\_1. Map copyright: © GoogleMap.

### 3. Flights during the ChemCallInt campaign

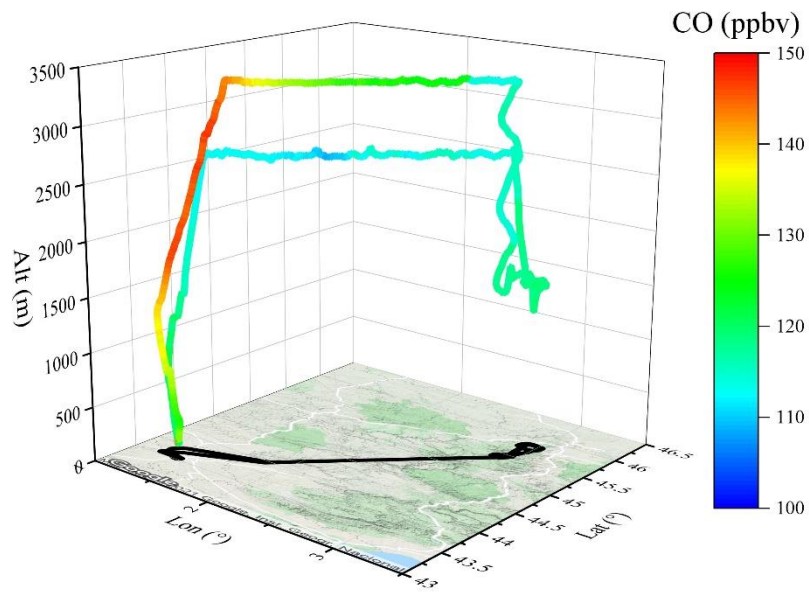

Figure S28: Flight trajectory colored by CO levels on flight-ChemCallInt\_20140520\_1. Map copyright: © GoogleMap.

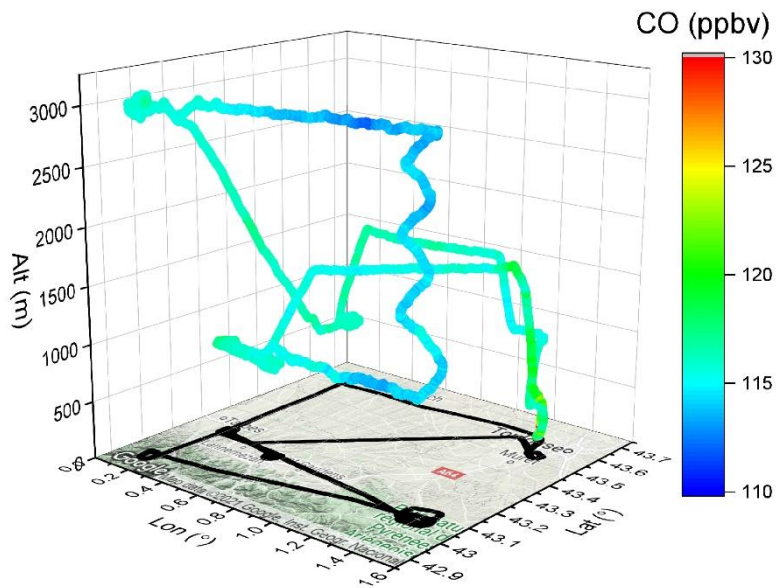

Figure S29: Flight trajectory colored by CO levels on flight-ChemCallInt\_20140522\_1. Map copyright: © GoogleMap.

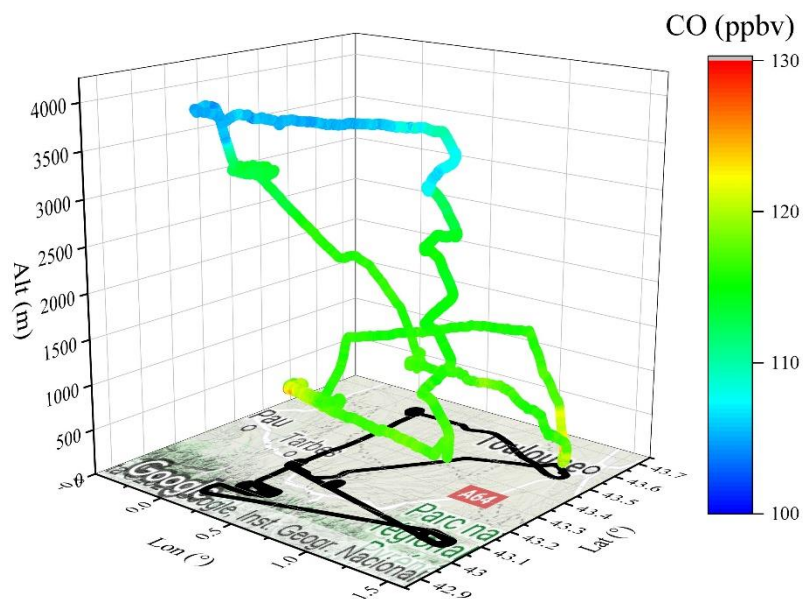

Figure S30: Flight trajectory colored by CO levels on flight-ChemCalInt\_20140527\_1. Map copyright: © GoogleMap.

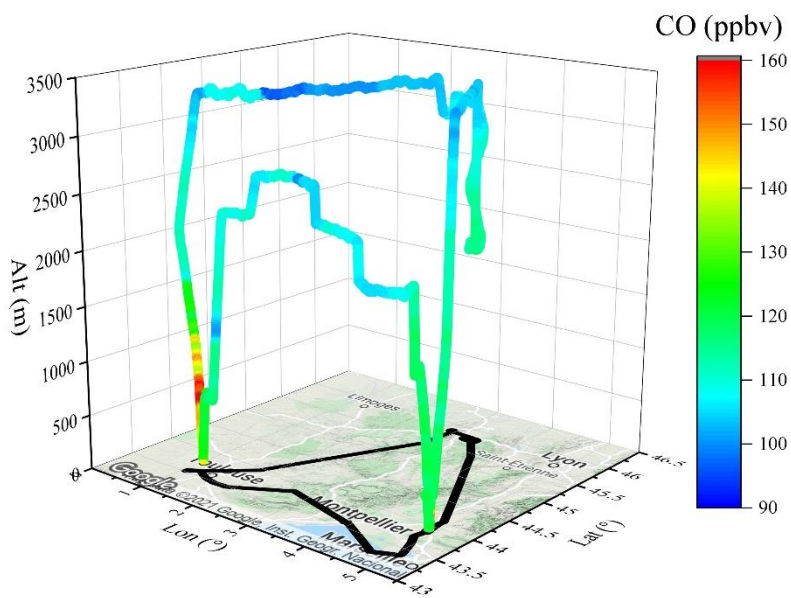

Figure S31: Flight trajectory colored by CO levels on flight-ChemCalInt\_20140528\_1. Map copyright: © GoogleMap.

## 4. Flights during the ChArMEx – GLAM campaign

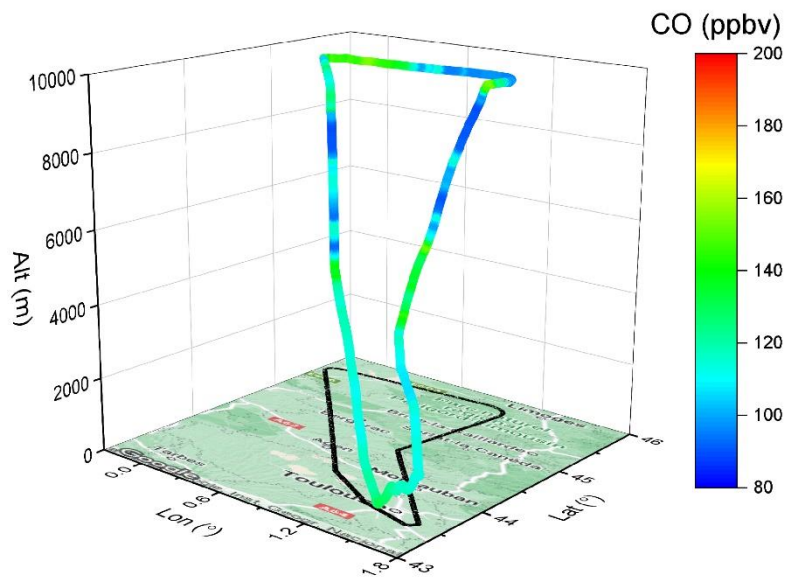

Figure S32: Flight trajectory colored by CO levels on flight-GLAM\_20140804\_1. Map copyright: © GoogleMap.

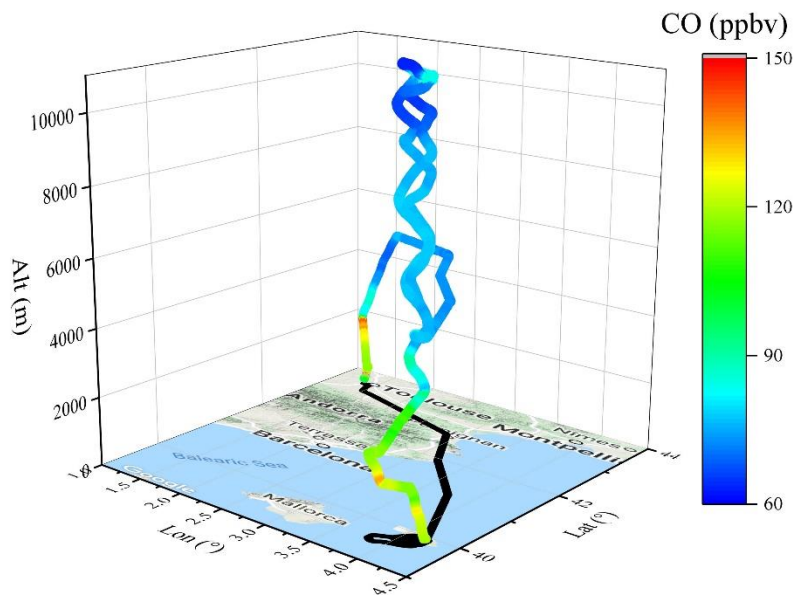

Figure S33: Flight trajectory colored by CO levels on flight-GLAM\_20140806\_1. Map copyright: © GoogleMap.

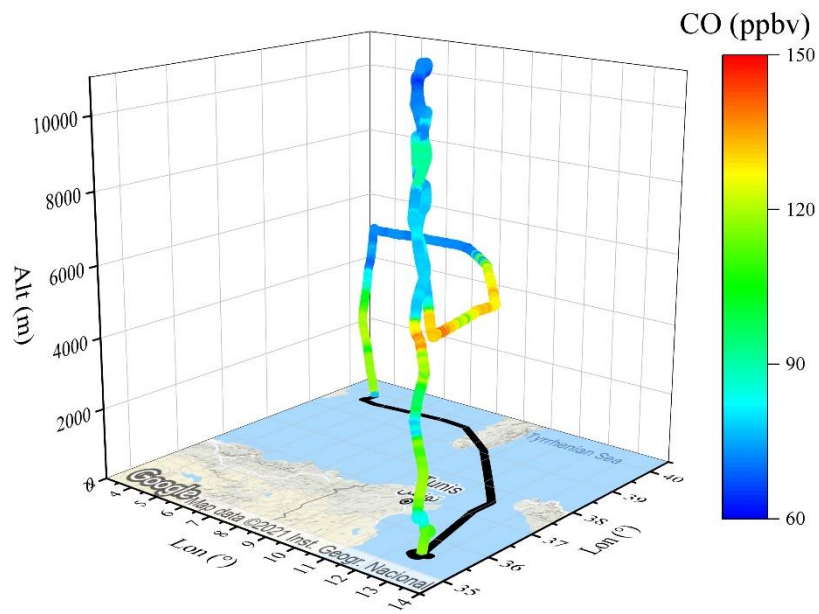

Figure S34: Flight trajectory colored by CO levels on flight-GLAM\_20140806\_2. Map copyright: © GoogleMap.

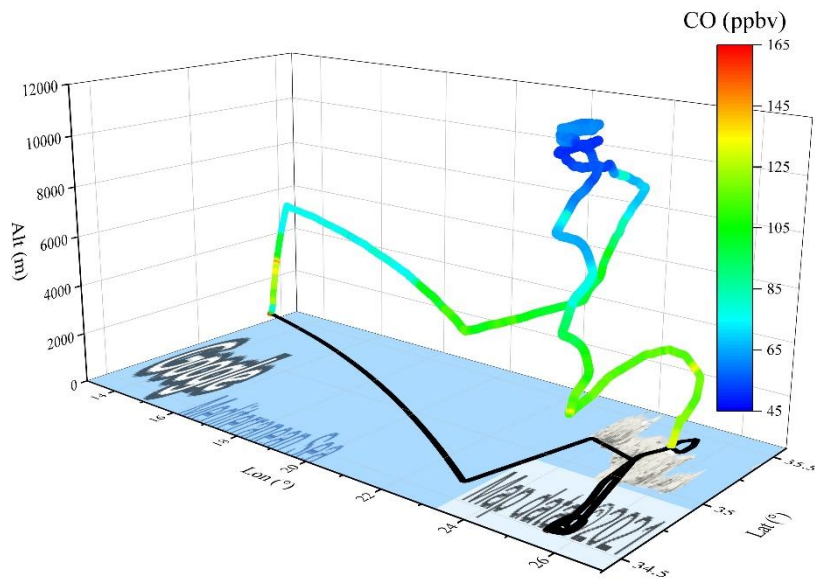

Figure S35: Flight trajectory colored by CO levels on flight-GLAM\_20140807\_1. Map copyright: © GoogleMap.

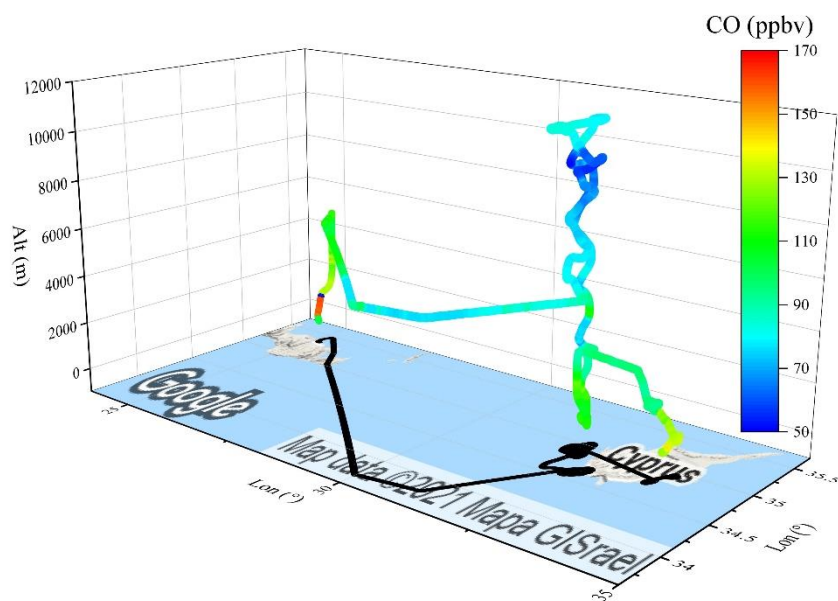

Figure S36: Flight trajectory colored by CO levels on flight-GLAM\_20140807\_2. Map copyright: © GoogleMap.

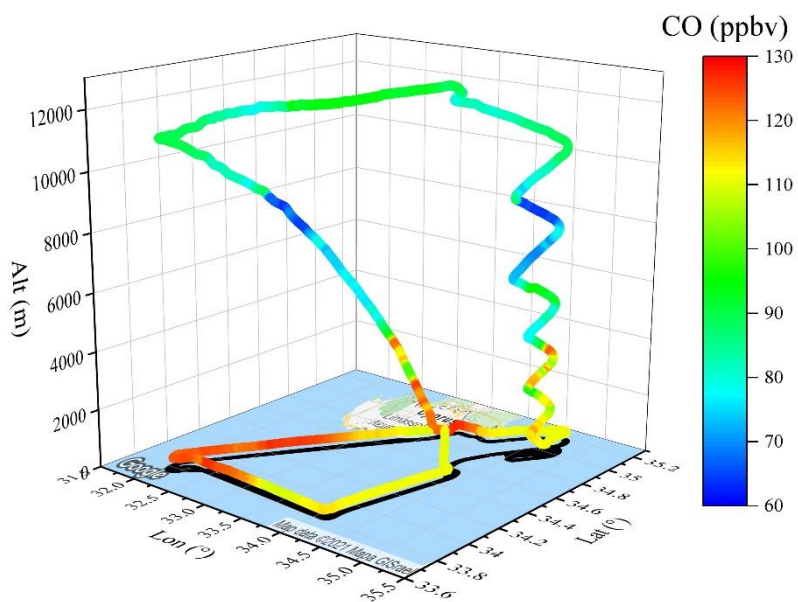

Figure S37: Flight trajectory colored by CO levels on flight-GLAM\_20140808\_1. Map copyright: © GoogleMap.



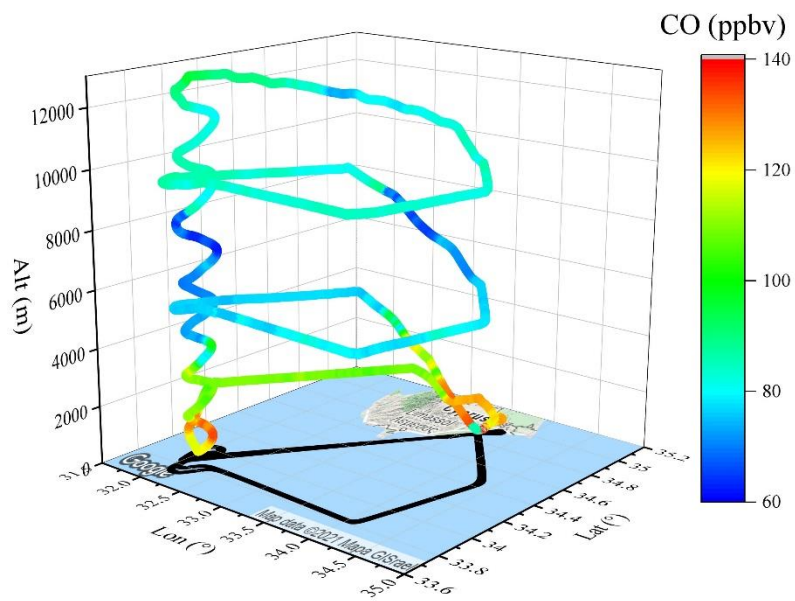

Figure S38: Flight trajectory colored by CO levels on flight-GLAM\_20140808\_2. Map copyright: © GoogleMap.

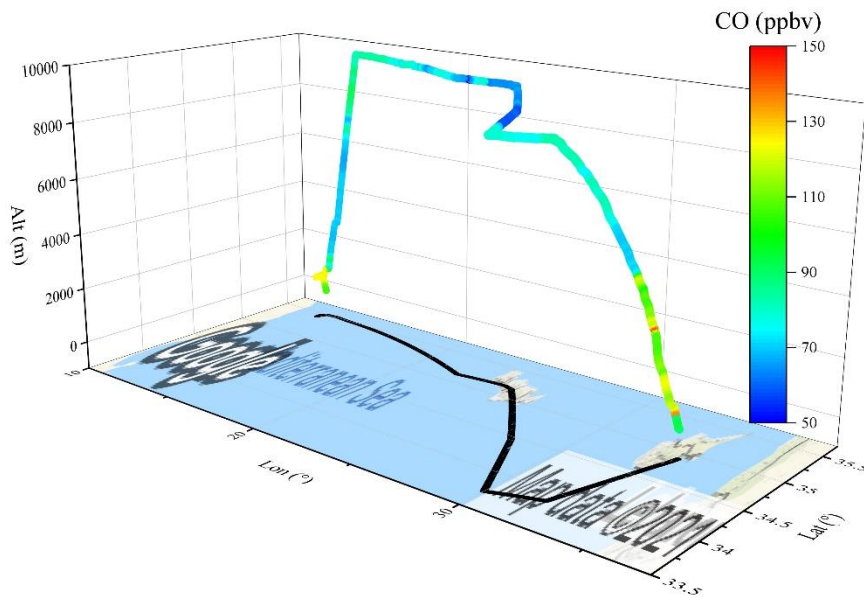

Figure S39: Flight trajectory colored by CO levels on flight-GLAM\_20140810\_1. Map copyright: © GoogleMap.

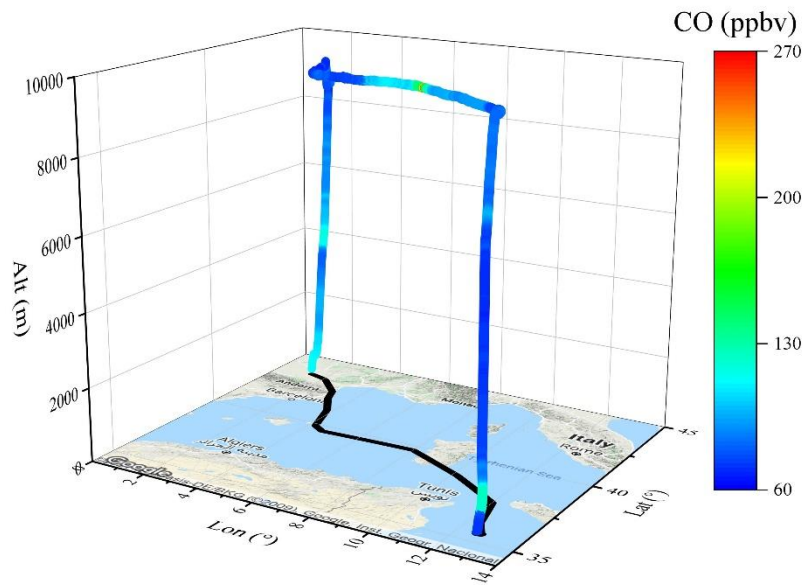

Figure S40: Flight trajectory colored by CO levels on flight-GLAM\_20140810\_2. Map copyright: © GoogleMap.

# 5. Flights during the Test-ATR-42 campaign

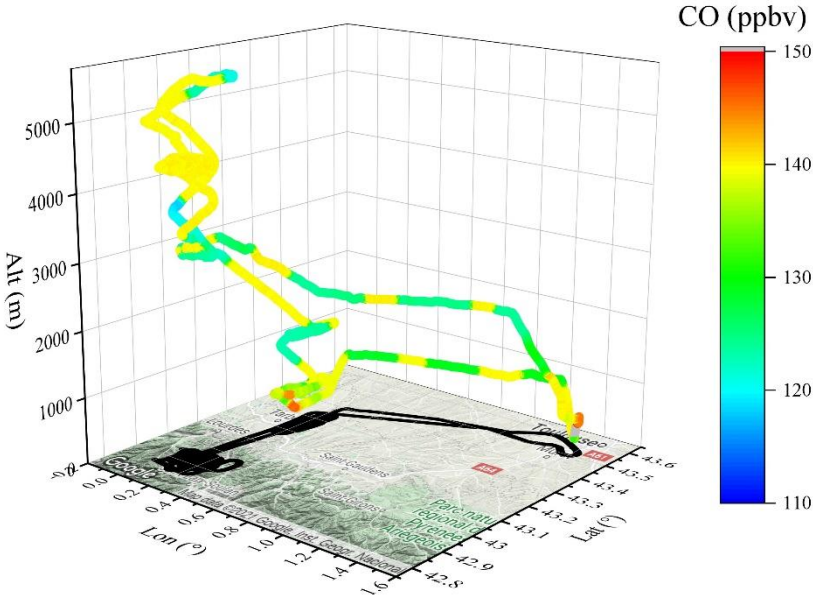

Figure S41: Flight trajectory colored by CO levels on flight-Test-ATR-42\_20160205\_1. Map copyright: © GoogleMap.

## 6. Flights during the DACCIWA campaign

The five transfer flights are only shown in Figure 21 in the main text.

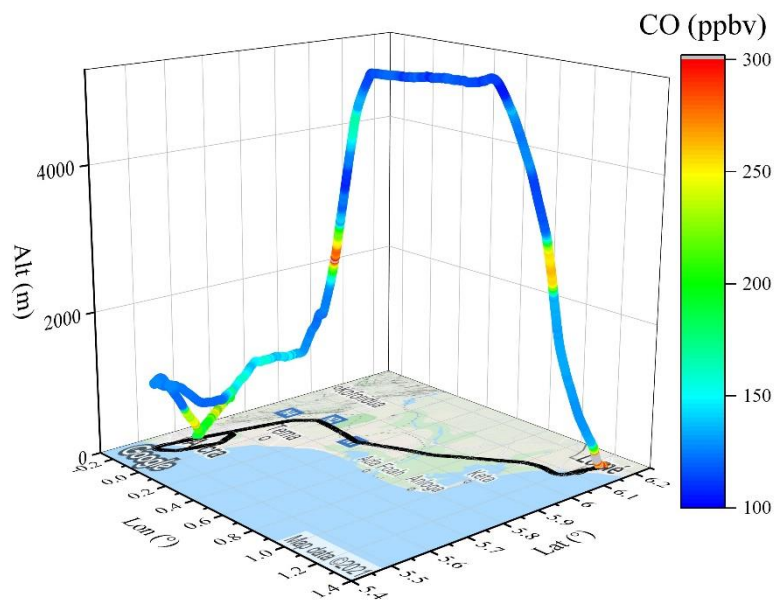

Figure S42: Flight trajectory colored by CO levels on flight-DACCIWA\_20160628\_1. Map copyright: © GoogleMap.

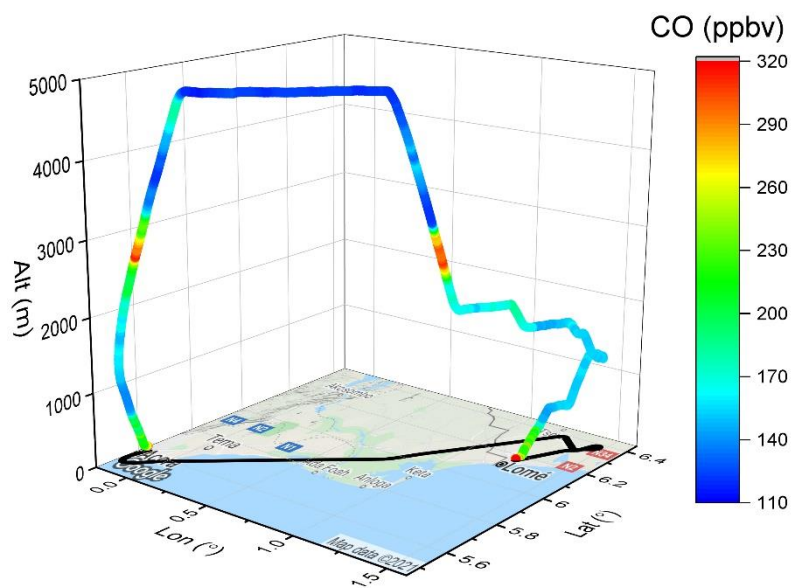

Figure S43: Flight trajectory colored by CO levels on flight-DACCIWA\_20160628\_2. Map copyright: © GoogleMap.

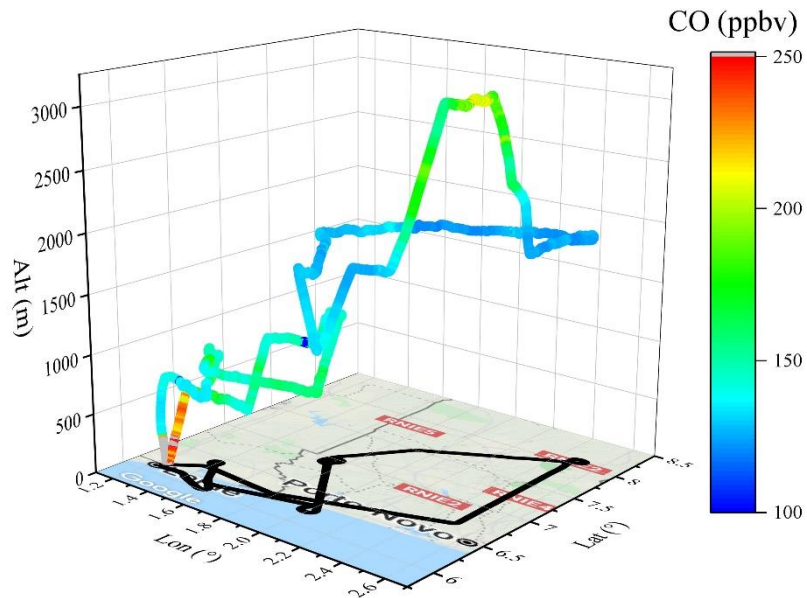

Figure S44: Flight trajectory colored by CO levels on flight-DACCIWA\_20160629\_1. Map copyright: © GoogleMap.

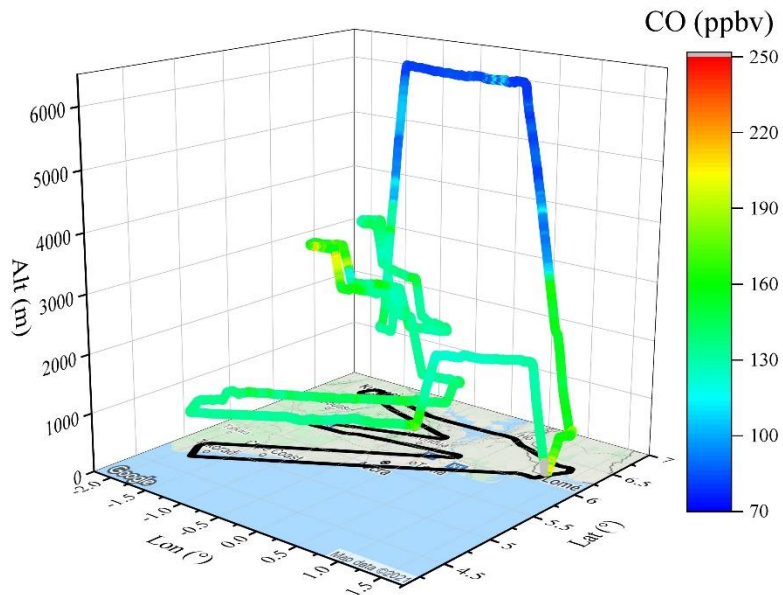

Figure S45: Flight trajectory colored by CO levels on flight-DACCIWA\_20160630\_1. Map copyright: © GoogleMap.

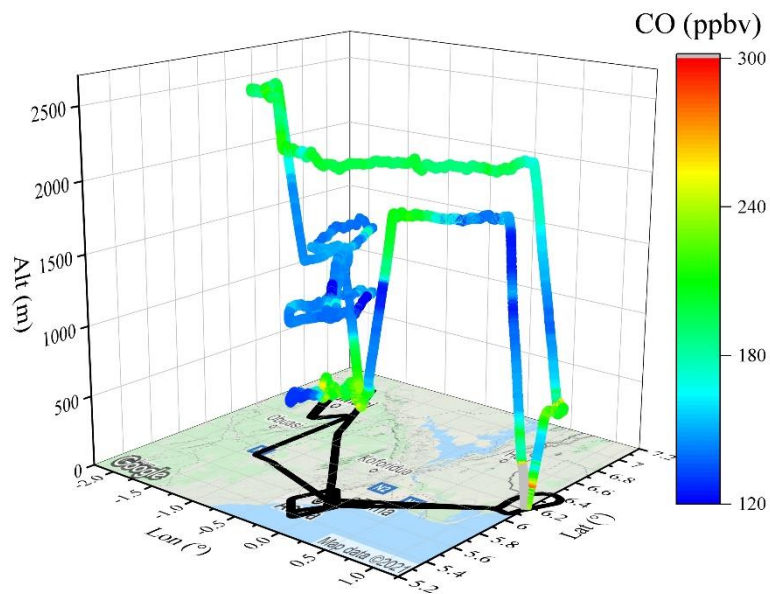

Figure S46: Flight trajectory colored by CO levels on flight-DACCIWA\_20160701\_1. Map copyright: © GoogleMap.

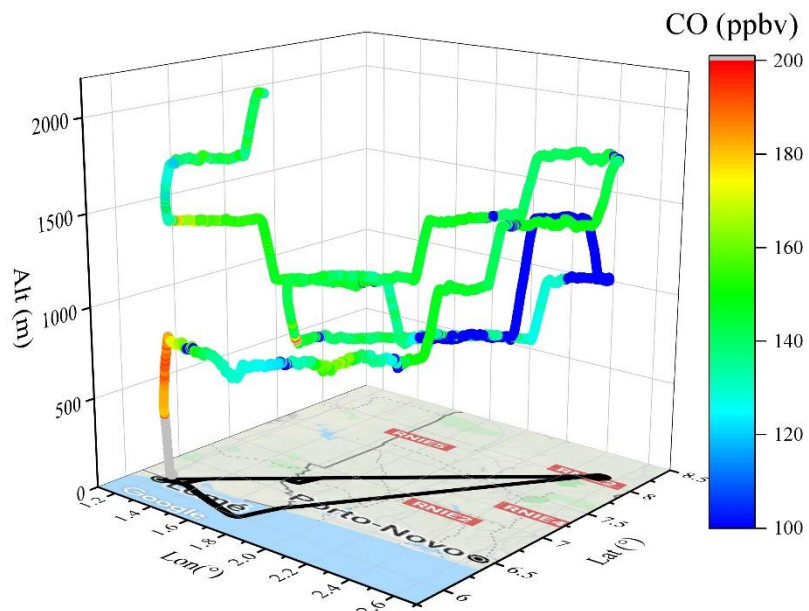

Figure S47: Flight trajectory colored by CO levels on flight-DACCIWA\_20160705\_1. Map copyright: © GoogleMap.



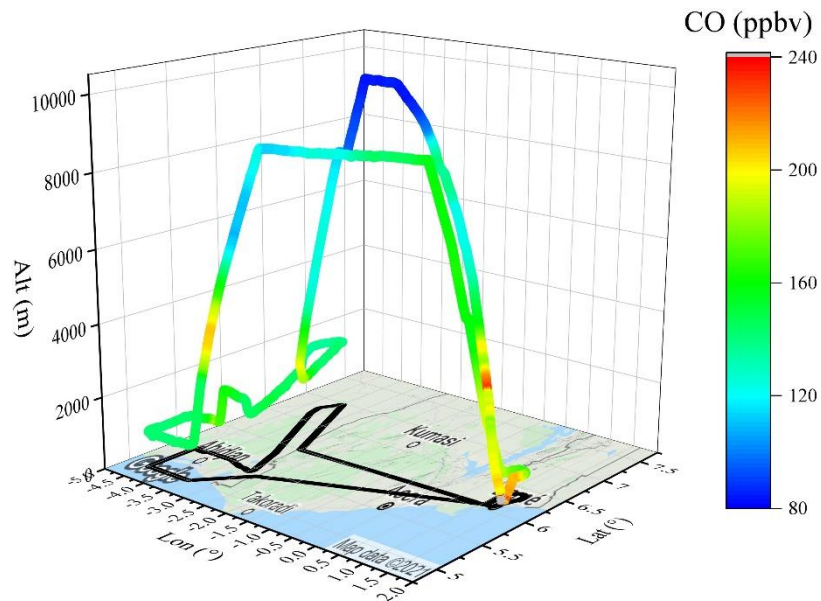

Figure S48: Flight trajectory colored by CO levels on flight-DACCIWA\_20160706\_1. Map copyright: © GoogleMap.

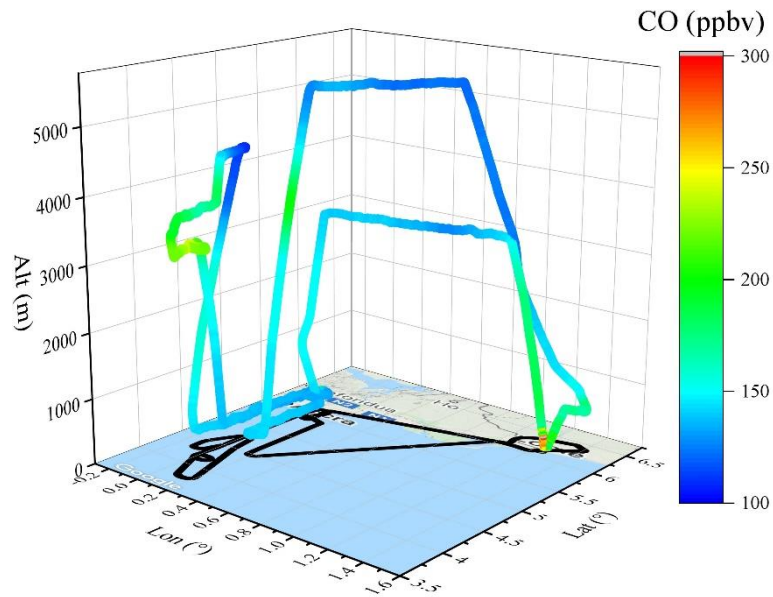

Figure S49: Flight trajectory colored by CO levels on flight-DACCIWA\_20160707\_1. Map copyright: © GoogleMap.

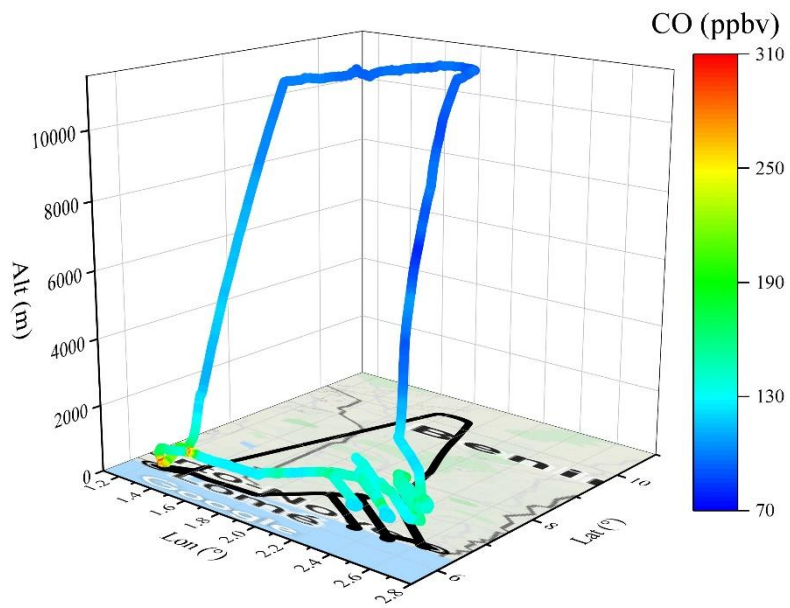

Figure S50: Flight trajectory colored by CO levels on flight-DACCIWA\_20160708\_1. Map copyright: © GoogleMap.

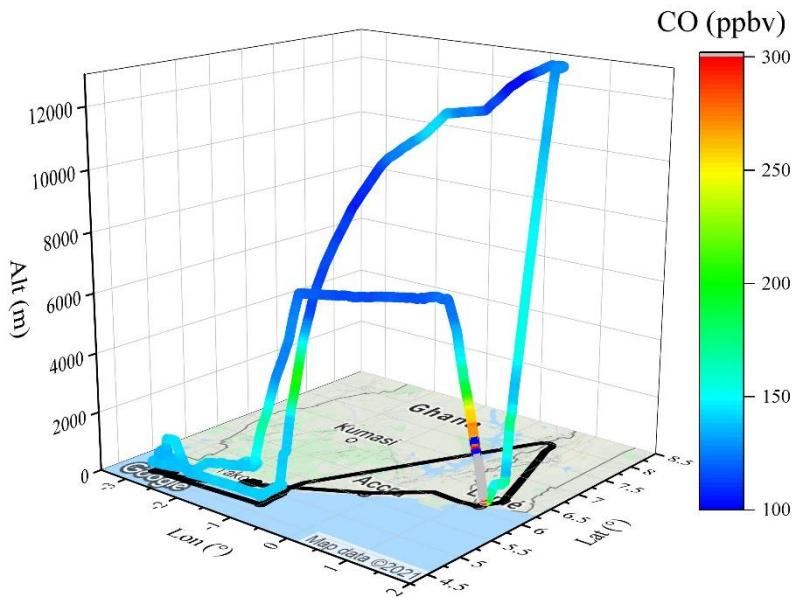

Figure S51: Flight trajectory colored by CO levels on flight-DACCIWA\_20160710\_1. Map copyright: © GoogleMap.

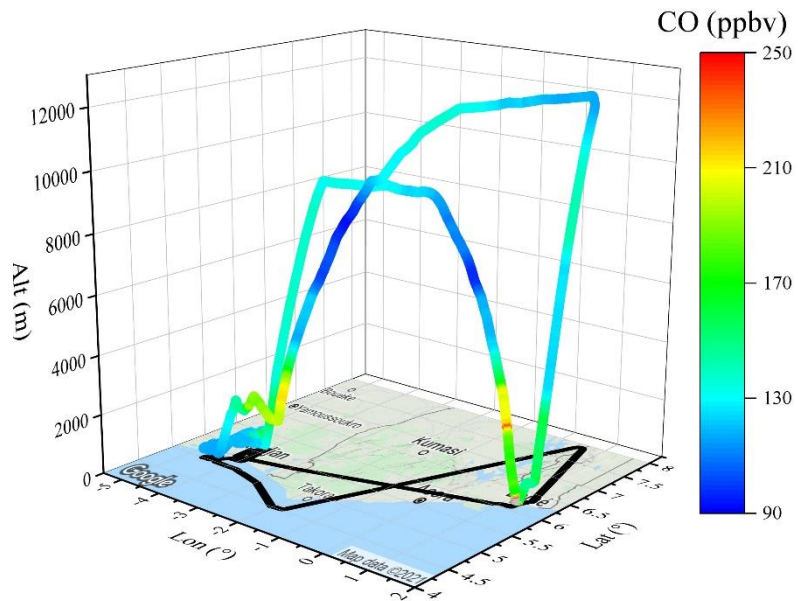

Figure S52: Flight trajectory colored by CO levels on flight-DACCIWA\_20160711\_1. Map copyright: © GoogleMap.

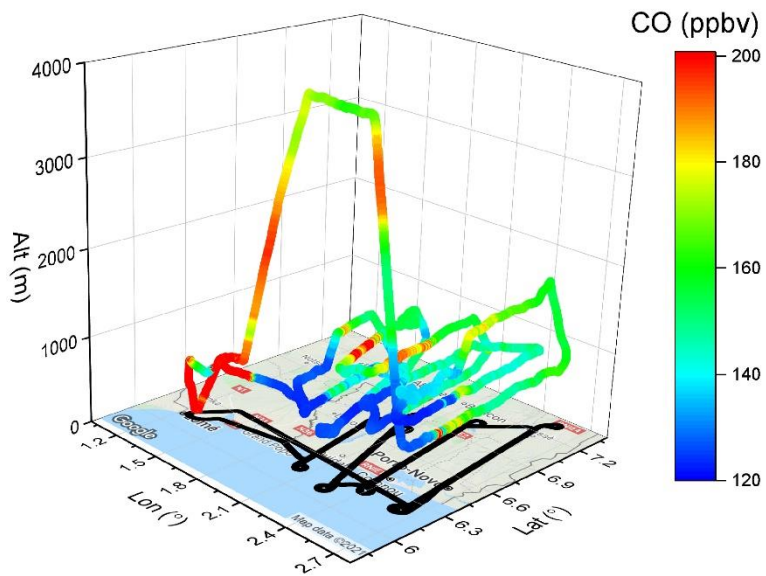

Figure S53: Flight trajectory colored by CO levels on flight-DACCIWA\_20160712\_1. Map copyright: © GoogleMap.

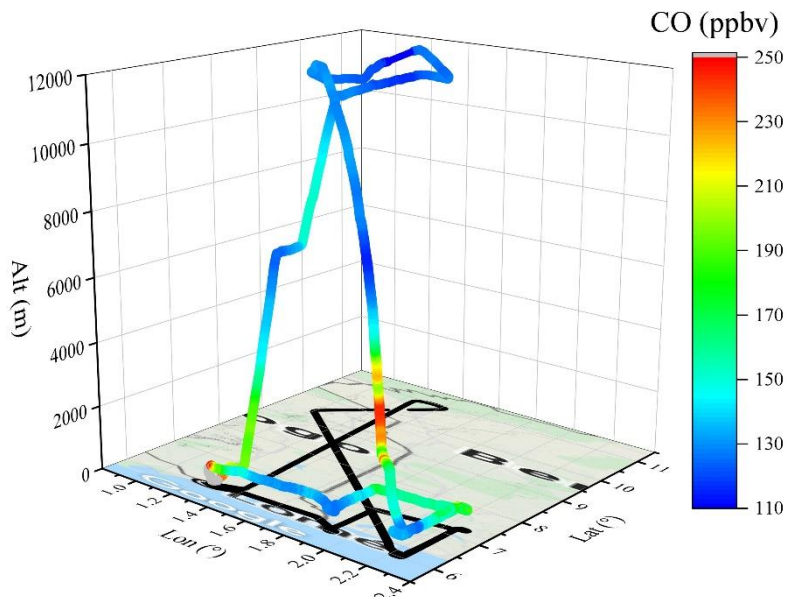

Figure S54: Flight trajectory colored by CO levels on flight-DACCIWA\_20160713\_1. Map copyright: © GoogleMap.

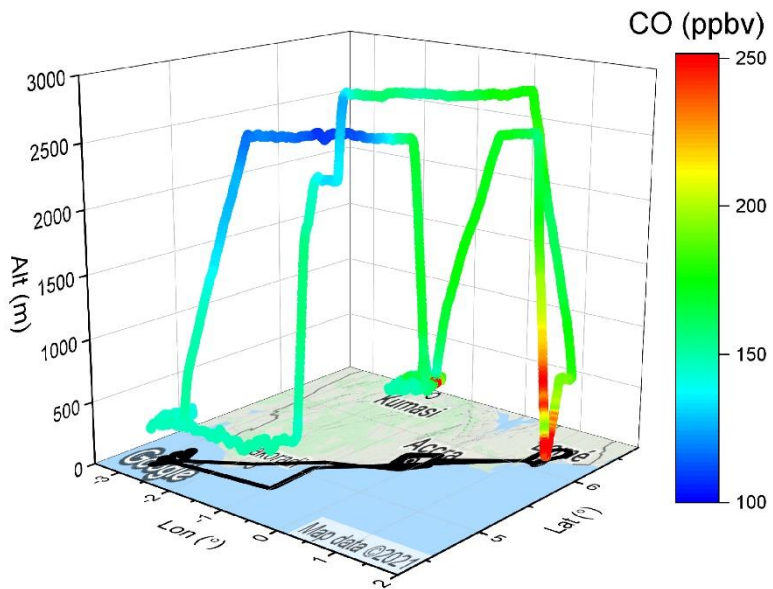

Figure S55: Flight trajectory colored by CO levels on flight-DACCIWA\_20160714\_1. Map copyright: © GoogleMap.

## 7. Flights during the MAGIC-2019 campaign

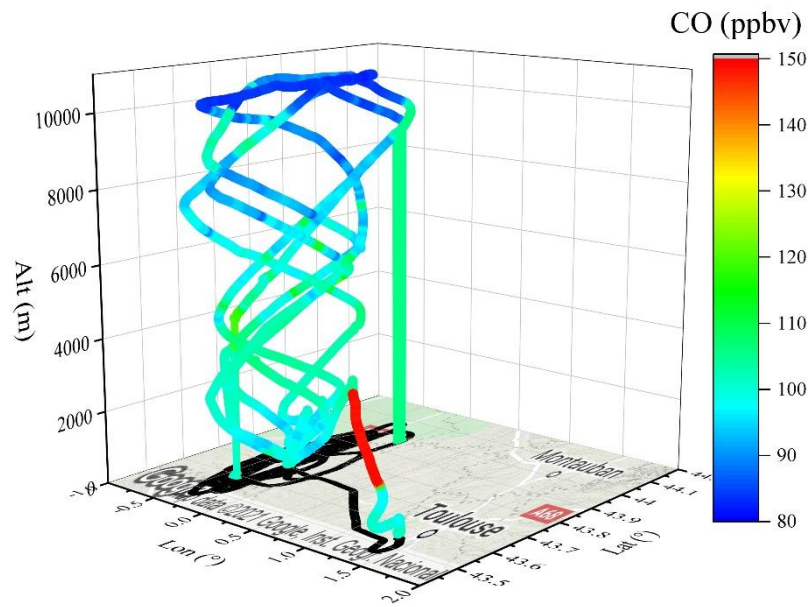

Figure S56: Flight trajectory colored by CO levels on flight-MAGIC\_20190613\_1. Map copyright: © GoogleMap.

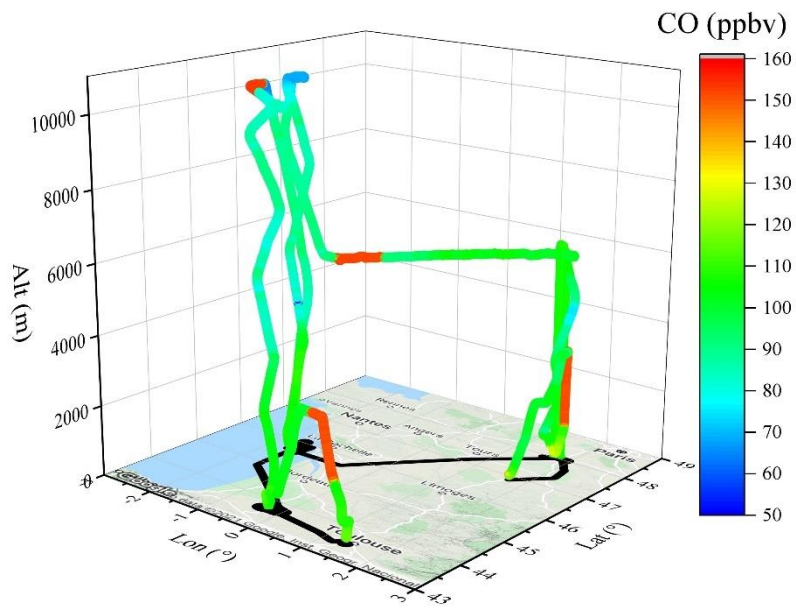

Figure S57: Flight trajectory colored by CO levels on flight-MAGIC\_20190618\_1. Map copyright: © GoogleMap.

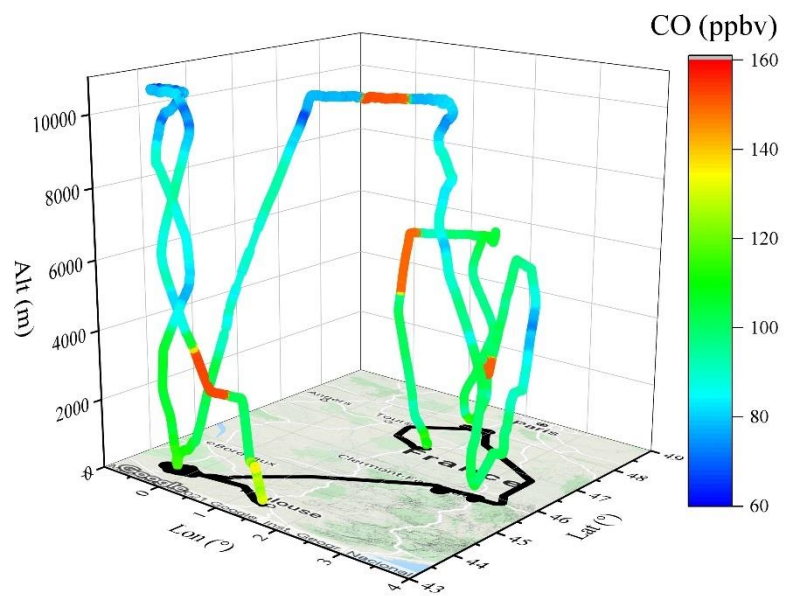

Figure S58: Flight trajectory colored by CO levels on flight-MAGIC\_20190618\_2. Map copyright: © GoogleMap.



## 8. Flights during the MAGIC-2021 campaign

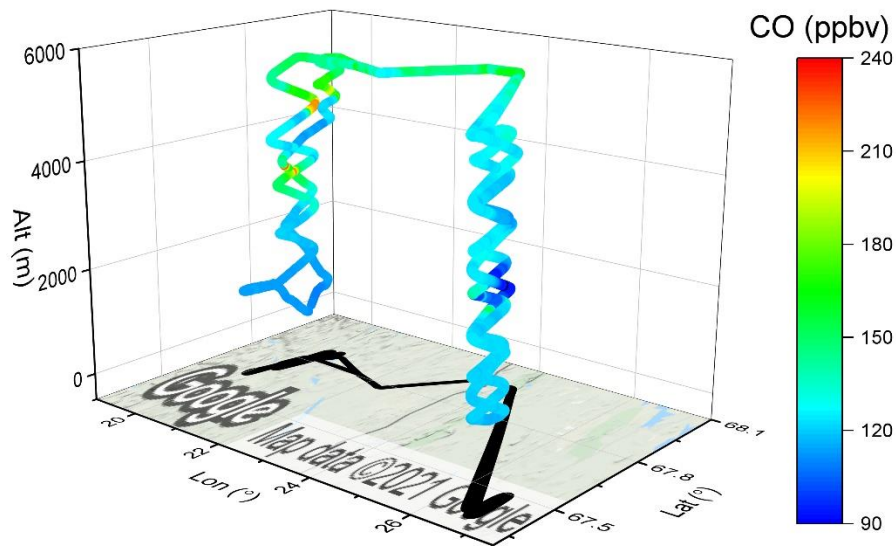

Figure S59: Flight trajectory colored by CO levels on flight-MAGIC\_20210817\_1. Map copyright: © GoogleMap.

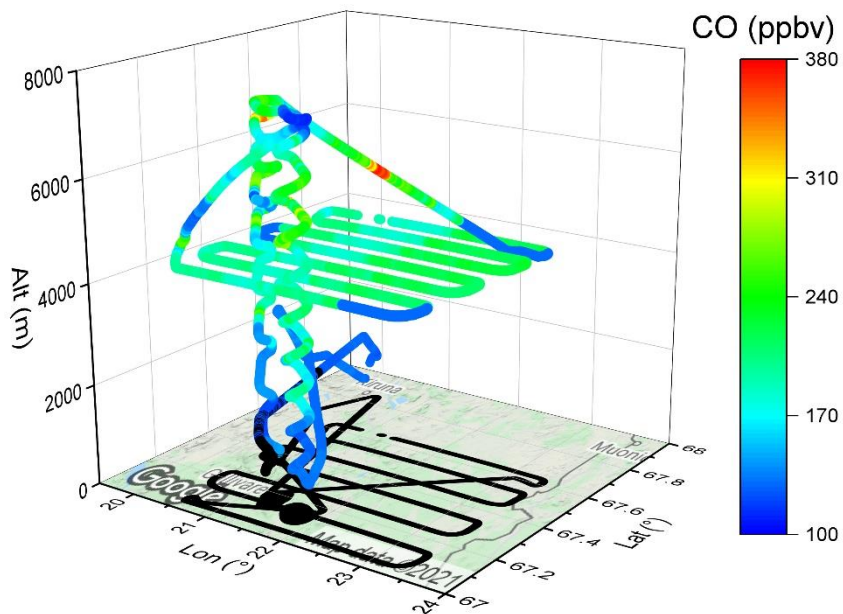

Figure S60: Flight trajectory colored by CO levels on flight-MAGIC\_20210823\_1. Map copyright: © GoogleMap.

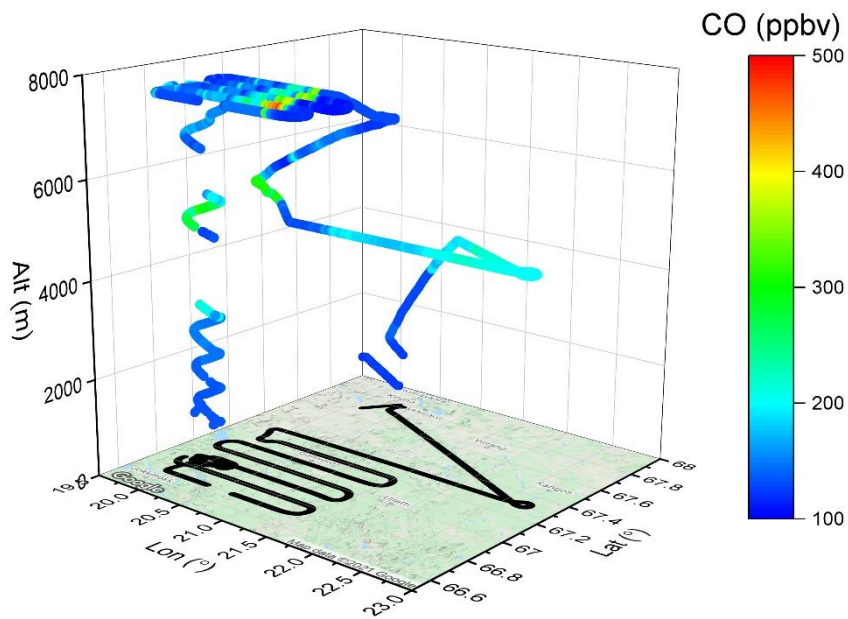

Figure S61: Flight trajectory colored by CO levels on flight-MAGIC\_20210823\_2. Map copyright: © GoogleMap.

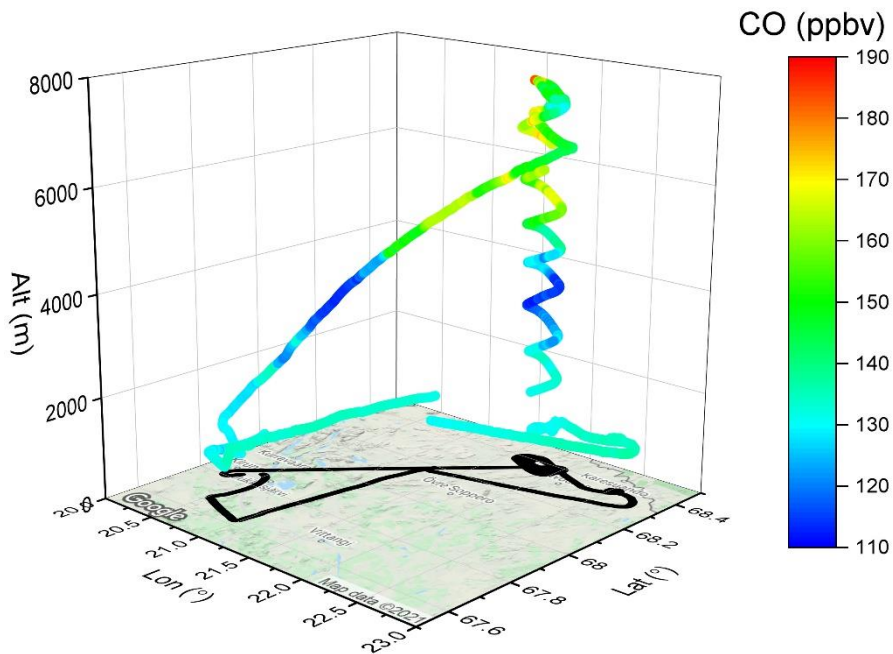

Figure S62: Flight trajectory colored by CO levels on flight-MAGIC\_20210824\_1. Map copyright: © GoogleMap.

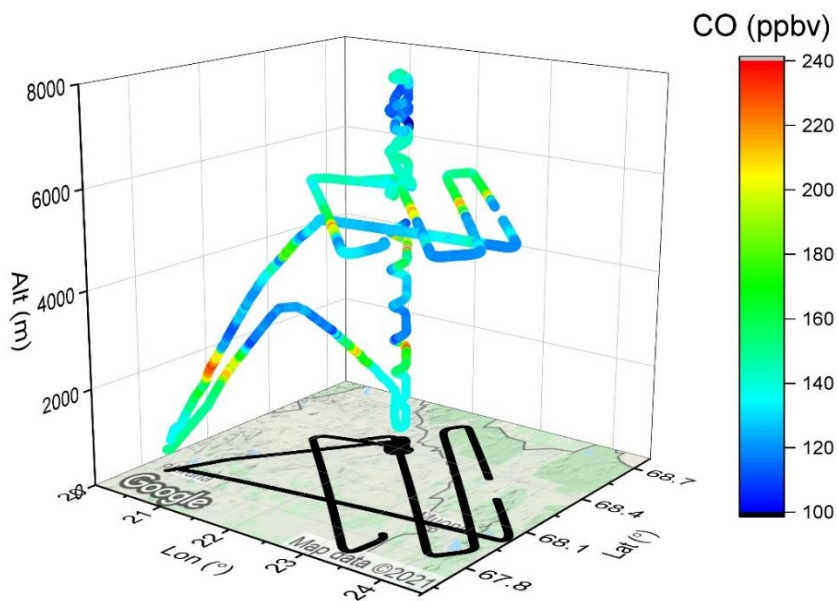

Figure S63: Flight trajectory colored by CO levels on flight-MAGIC\_20210826\_1. Map copyright: © GoogleMap.

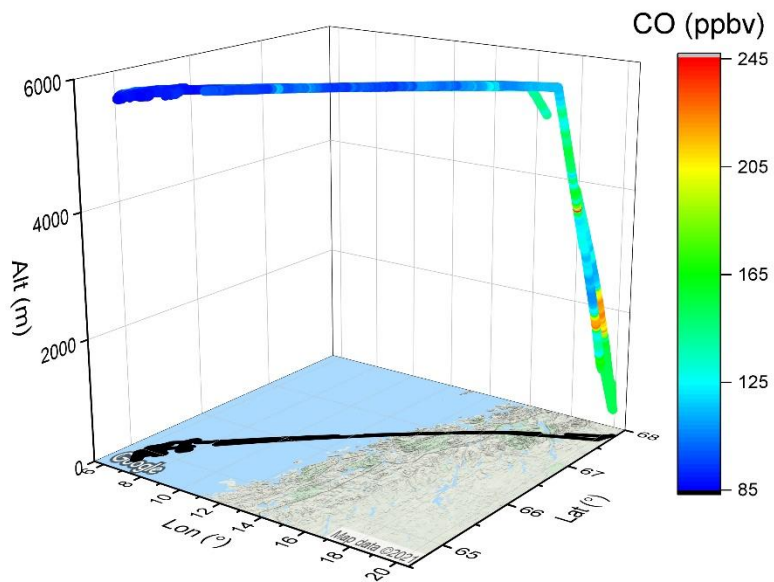

Figure S64: Flight trajectory colored by CO levels on flight-MAGIC\_20210826\_2. Map copyright: © GoogleMap.

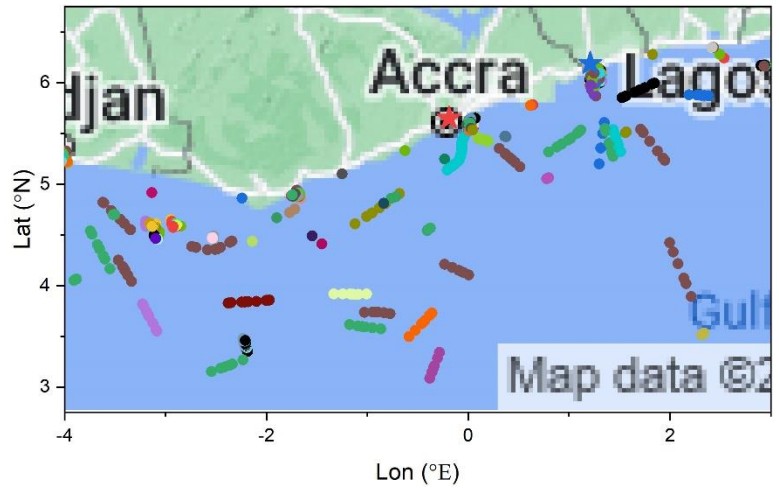

Figure S65: Ship position on 7 July 2016 (Date source: Marine Traffic). The red and the blue stars represent Accra and Lomé ports, respectively. © GoogleMap.
